# Supplementary material for: Neural Organization of the Optic Lobe Changes Steadily from Late Embryonic Stage to Adulthood in Cuttlefish Sepia pharaonis
Source: PubMed Central journal article supplement (PMC5529416; doi:10.3389/fphys.2017.00538), 2017-07-27
Supplement: Table1.pdf [file Table1.pdf]

**Table S1.** The optic lobe samples and their nuclear staining methods.

| Age       | ML (cm) | Stage     | N* | Staining |
|-----------|---------|-----------|----|----------|
| st. 22    | -       | embryo    | 2  | DAPI     |
| st. 23    | -       | embryo    | 6  | DAPI     |
| st. 24    | -       | embryo    | 6  | DAPI     |
| st. 25    | -       | embryo    | 6  | DAPI     |
| st. 26    | -       | embryo    | 6  | DAPI     |
| st. 27    | -       | embryo    | 6  | DAPI     |
| st. 28    | -       | embryo    | 6  | DAPI     |
| st. 29    | -       | embryo    | 6  | DAPI     |
| hatchling | -       | hatchling | 3  | DAPI     |
| -         | 0.9     | juvenile  | 4  | DAPI     |
| -         | 1.0     | juvenile  | 2  | DAPI     |
| -         | 1.0     | juvenile  | 6  | DAPI     |
| -         | 1.1     | juvenile  | 6  | DAPI     |
| -         | 1.1     | juvenile  | 2  | DAPI     |
| -         | 1.3     | juvenile  | 4  | DAPI     |
| -         | 2.5     | juvenile  | 3  | DAPI     |
| -         | 2.7     | juvenile  | 1  | DAPI     |
| -         | 4.3     | juvenile  | 2  | PI       |
| -         | 8.0     | sub-adult | 2  | PI       |
| -         | 13.6    | sub-adult | 1  | PI       |
| -         | 17.0    | sub-adult | 2  | PI       |
| -         | 19.5    | adult     | 2  | PI       |
| -         | 22.5    | adult     | 1  | PI       |
| -         | 30.2    | adult     | 2  | PI       |

\* N = the number of OPL samples.

**Table S2.** All measurements from the left and right optic lobes are monotonically related\*.

|                                    | Optic lobe area | Medulla area | Tangential zone area | Cell islands area | Cortex thickness | Radial column zone thickness |
|------------------------------------|-----------------|--------------|----------------------|-------------------|------------------|------------------------------|
| Spearman's correlation coefficient | 0.991           | 0.984        | 0.984                | 0.965             | 0.949            | 0.958                        |
| <i>p</i> value                     | < 0.001         | < 0.001      | < 0.001              | < 0.001           | < 0.001          | < 0.001                      |

\*This suggests that the developmental pace of each pair of optic lobes is similar.

**Table S3.** Standard errors not shown in Figure 4E and 4F.

| Stage     | Cortex (%) | R.z (%)    | T.z. (%)   | Islands (%) |
|-----------|------------|------------|------------|-------------|
| st. 22    | 20.93±2.69 | 0.00±0.00  | 79.07±2.69 | 98.19±0.26  |
| st. 23    | 16.13±1.09 | 0.00±0.00  | 83.87±1.09 | 92.24±0.74  |
| st. 24    | 13.78±0.71 | 11.51±1.57 | 74.72±1.50 | 80.06±1.49  |
| st. 25    | 12.34±1.03 | 14.15±0.33 | 73.51±0.83 | 79.05±0.95  |
| st. 26    | 13.90±0.96 | 13.02±1.82 | 73.08±1.62 | 80.81±1.88  |
| st. 27    | 13.92±0.66 | 14.93±1.12 | 71.14±0.76 | 72.72±1.00  |
| st. 28    | 14.86±0.62 | 14.47±0.68 | 70.67±0.88 | 77.12±2.41  |
| st. 29    | 15.48±0.70 | 17.70±1.12 | 66.82±0.57 | 71.23±2.81  |
| hatchling | 18.95±0.72 | 20.41±2.06 | 60.63±2.77 | 67.47±3.89  |

**Table S4.** Standard errors not shown in Figure 6E and 6F.

| ML (cm) | Cortex (%) | R.z. (%)   | T.z. (%)   | Islands (%) |
|---------|------------|------------|------------|-------------|
| 0.9     | 16.22±1.64 | 17.04±1.21 | 66.73±0.77 | 61.38±2.33  |
| 1.0     | 17.18±1.19 | 16.27±0.83 | 66.55±1.46 | 56.40±1.65  |
| 1.1     | 15.95±0.83 | 16.54±0.77 | 67.51±0.86 | 59.06±1.31  |
| 1.3     | 17.11±1.51 | 15.01±0.82 | 67.88±1.83 | 55.11±2.96  |
| 2.5     | 15.94±0.60 | 23.66±1.51 | 60.4±2.10  | 47.44±0.68  |
| 2.7     | 16.33      | 24.67      | 59.01      | 45.96       |
| 4.3     | 15.08±0.25 | 31.79±3.10 | 53.14±3.35 | 45.17±4.9   |
| 8.0     | 14.18±1.02 | 35.21±0.05 | 50.61±1.08 | 37.12±3.54  |
| 13.6    | 11.68      | 34.24      | 54.08      | 37.04       |
| 17.0    | 9.69±1.86  | 35.58±3.27 | 54.73±1.41 | 27.3±0.72   |
| 19.5    | 9.94±0.22  | 29.91±0.06 | 60.14±0.16 | 23.81±1.41  |
| 22.5    | 9.24       | 30.64      | 60.11      | 26.36       |
| 30.2    | 8.52±1.33  | 30.99±0.09 | 60.49±1.24 | 24.99±4.69  |

**Table S5.** Standard errors not shown in Figure S1.

| Stage    | Input (%)  | T.z. (%)   | Output (%) |
|----------|------------|------------|------------|
| embryo   | 18.80±1.39 | 72.57±1.38 | 8.63±1.47  |
| juvenile | 20.75±0.60 | 74.22±0.90 | 5.03±1.40  |
| adult    | 22.93±0.75 | 74.61±0.44 | 2.46±0.47  |
